# Supplementary material for: CD27hiCD38hi plasmablasts are activated B cells of mixed origin with distinct function
Source: PubMed Central journal article supplement — iScience. 2021 Apr 29;24(5):102482. doi: 10.1016/j.isci.2021.102482 (PMC8169951; doi:10.1016/j.isci.2021.102482), 2021-04-29
Supplement: mmc1.pdf [file mmc1.pdf]

**Supplemental information**

**CD27<sup>hi</sup>CD38<sup>hi</sup> plasmablasts  
are activated B cells of mixed  
origin with distinct function**

**Angeline Rouers, Ramapraba Appanna, Marion Chevrier, Josephine Lum, Mai Chan Lau, Lingqiao Tan, Thomas Loy, Alicia Tay, Raman Sethi, Durgalakshmi Sathiakumar, Kaval Kaur, Julia Böhme, Yee-Sin Leo, Laurent Renia, Shanshan W. Howland, Amit Singhal, Jinmiao Chen, and Katja Fink**

# Supplementary Figure S1

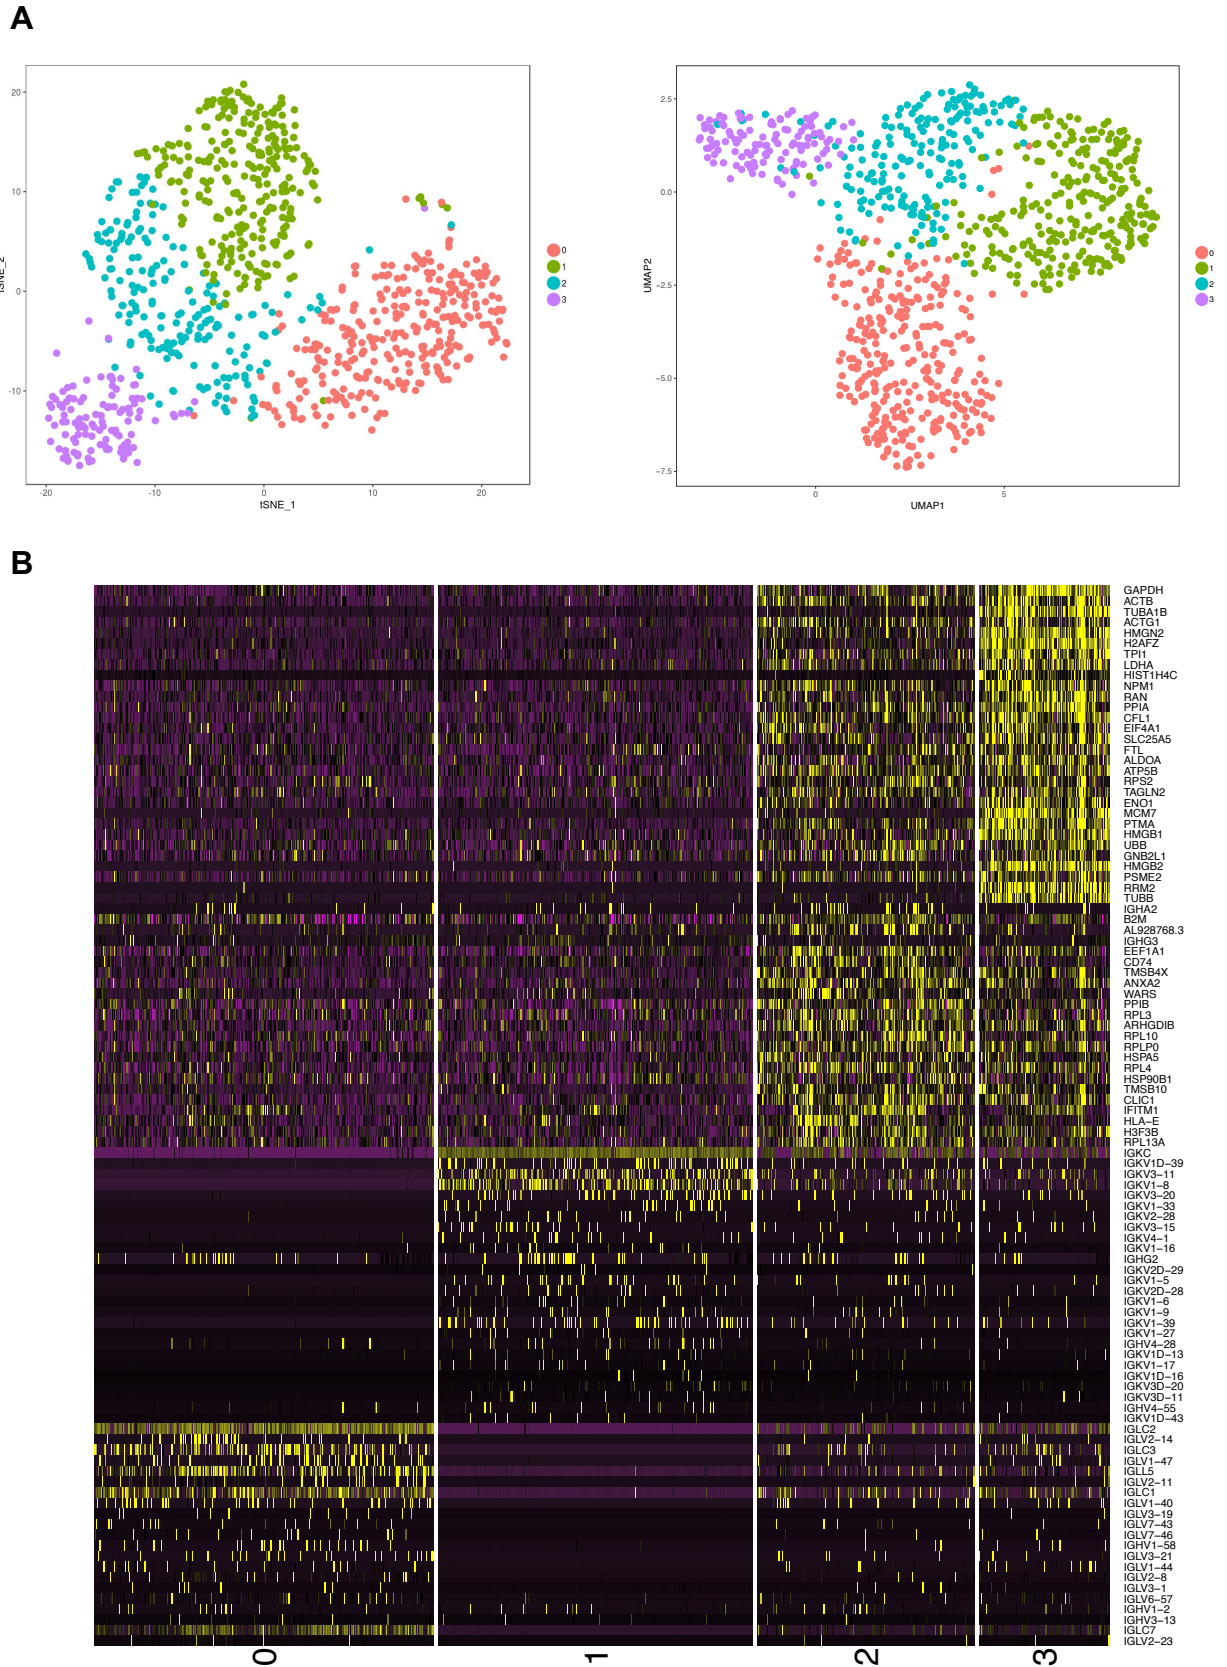

**Supplementary Figure S1: Clusters obtained using different algorithms and differences between clusters 0 and 1.** A) Transcriptome from 890 single plasmablasts from 5 patients (1 primary and 4 secondary infections) were used for the analysis. tSNE plot (left) and UMAP plot (right) using the 400 most variable genes from Singular. B) Heatmap showing the DEGs between cluster 0 and 1. Related to Figure 1.

# Supplementary Figure S2

**A**

| Patient ID    | Cluster | Cluster | Cluster | Total |
|---------------|---------|---------|---------|-------|
|               | 0/1     | 2       | 3       |       |
| E1481DK2 (NA) | 7       | 3       | 6       | 16    |
| LNA002 (V1)   | -       | -       | -       | -     |
| LNA002 (V2)   | 100     | 59      | 22      | 181   |
| LNA006 (V1)   | 85      | 24      | 39      | 148   |
| LNA006 (V2)   | 142     | 30      | 16      | 188   |
| LNA018 (V1)   | 24      | 37      | 12      | 73    |
| LNA018 (V2)   | 155     | 24      | 9       | 188   |
| LNA036 (V1)   | -       | -       | -       | -     |
| LNA036 (V2)   | 68      | 16      | 12      | 96    |

**B**

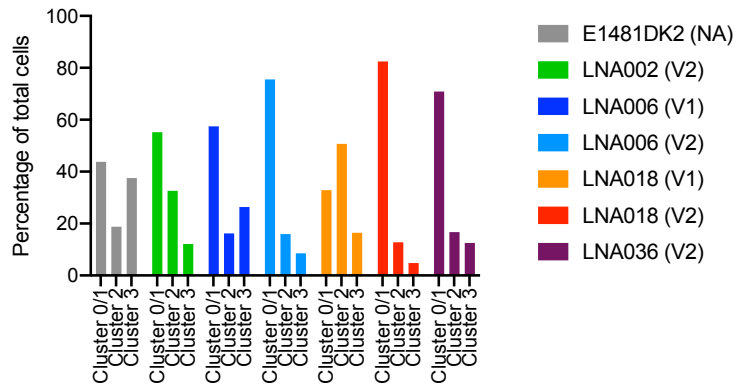

**C**

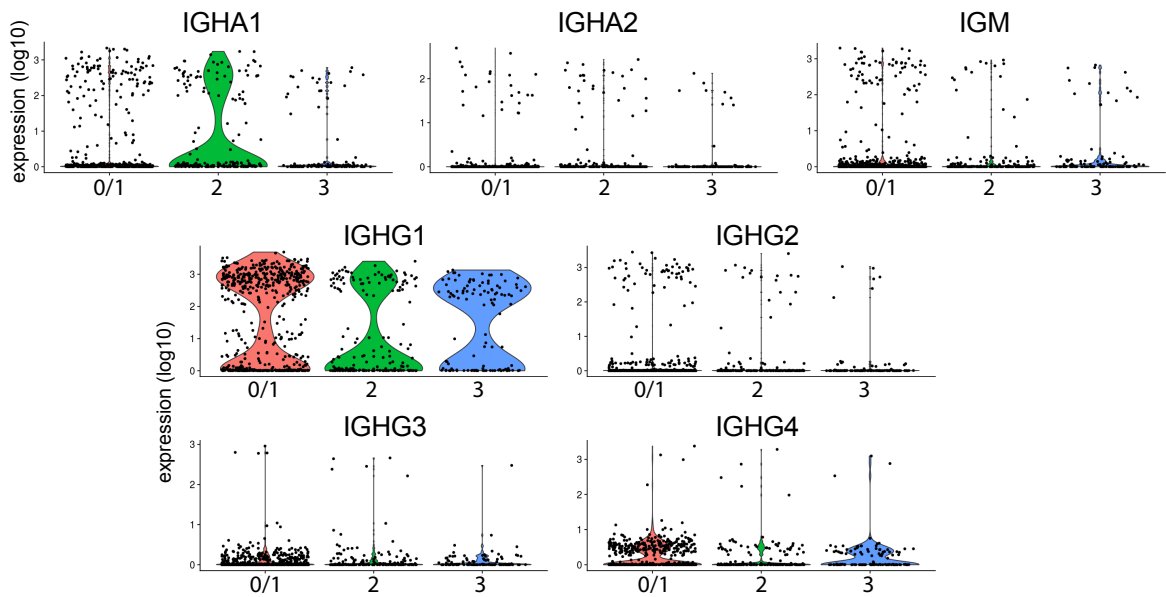

**Supplementary Figure S2: Cluster distribution and heavy chain isotype usage in plasmablast clusters.** A) Number of cells with scRNAseq data per patient sample and timepoint. The visit number is indicated in brackets for each sample. NA: not applicable. B) Normalized cluster size per patient sample and time point. C) Violin plots of the expression of each antibody isotype IGHA1 (IgA1), IGHA2 (IgA2), IGM (IgM), IGHG1 (IgG1), IGHG2 (IgG2), IGHG3 (IgG3) and IGHG4 (IgG4) is represented for individual plasmablasts (n=890) according to their cluster (0/1:red, 2: green, 3:blue). Related to Figure 1.

# Supplementary Figure S3

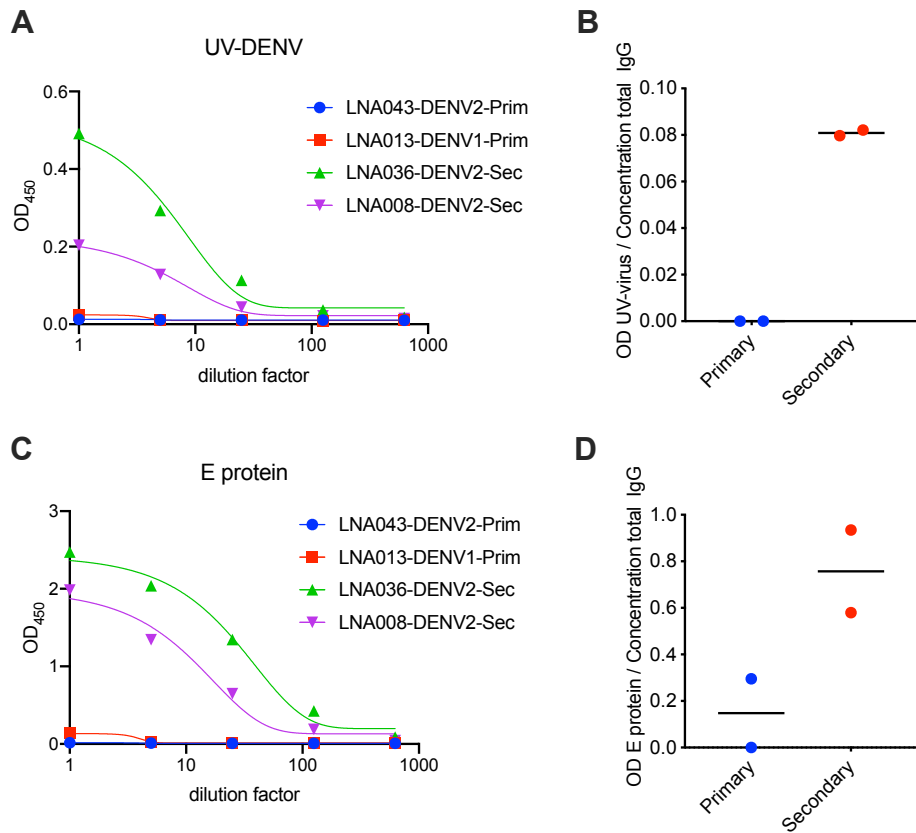

**Supplementary Figure S3: Specificity of antibodies secreted from bulk-sorted plasmablasts from primary and secondary patients. A-D)** Plasmablasts (CD19<sup>+</sup>IgD<sup>-</sup>CD38<sup>+</sup>CD27<sup>+</sup>) from two primary and two secondary patients early after dengue-infection (6-10 days post-fever) were sorted and cultured for 24h before collection of cell culture supernatant containing secreted antibodies. ELISA was performed to detect DENV-specific IgG binding to UV-inactivated DENV (A and B) or E protein (C and D) of the serotype of the current infection. B and D: OD-values for specific binding at 5x dilution (linear range of the dilution curve) were normalized to the concentration of total IgG detected in the supernatants. Each symbol represents one patient, the mean is indicated with a bar in (B) and (D). Samples were tested in duplicates. Related to Figure 2.

# Supplementary Figure S4

**A**

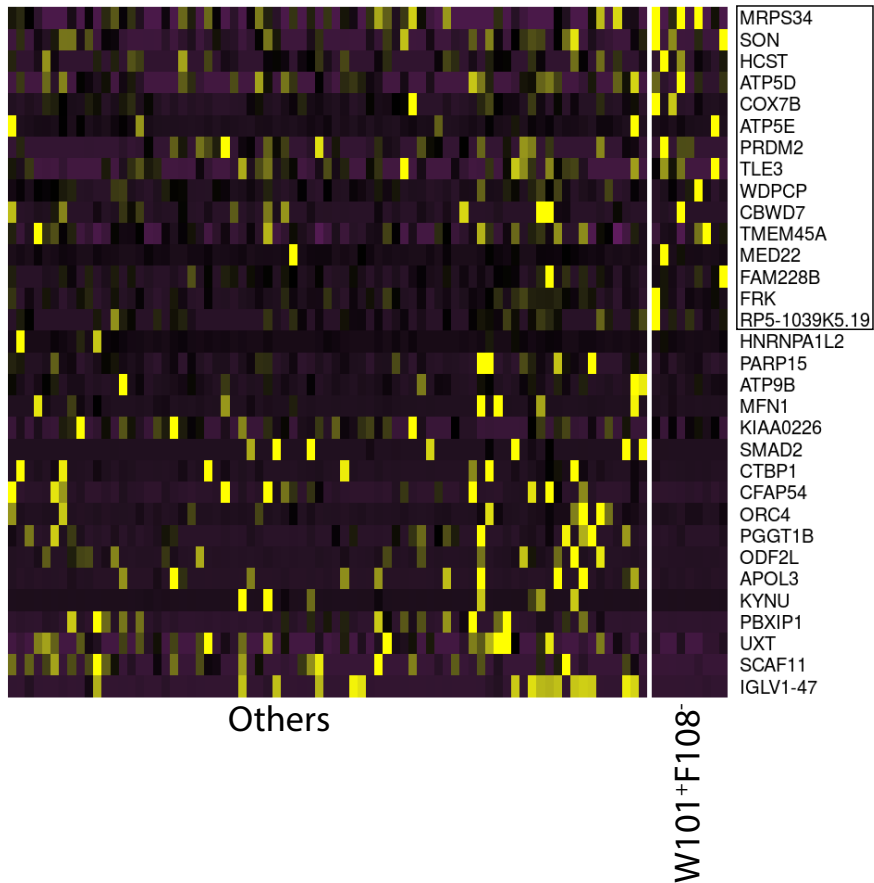

**B**

Analysis: W101+F108- DEG - 2020-01-08 09:02 AM

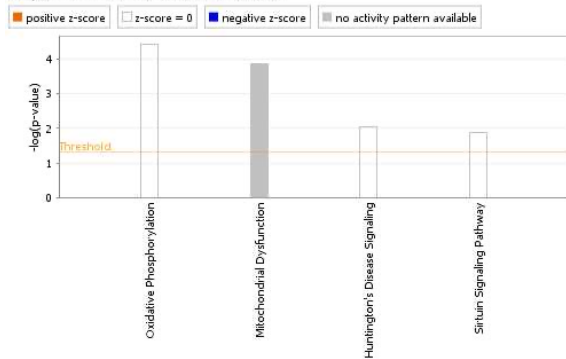

© 2000-2020 QIAGEN. All rights reserved.

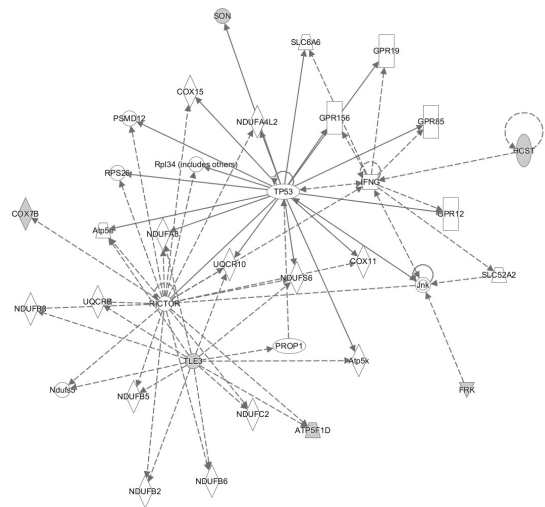

© 2000-2020 QIAGEN. All rights reserved.

**Supplementary Figure S4: Fusion loop W101+F108- plasmablast-derivate mAbs show a higher metabolic gene expression profile. A) Gene expression in W101+F108- mAbs compared to others. B) Most significant pathways (left) for the 15 genes framed in panel A and the network (right) including the highest number of these genes (n=6, genes of interest are indicated in grey). Ingenuity software (Qiagen) was used. For the network: dotted lines represent indirect interactions and solid lines represent direct interaction. Directions of the arrows represent the sense of the interaction. Related to Figure 2.**

# Supplementary Figure S5

**A**

VJ pairing cluster 0/1

VJ pairing cluster 2

VJ pairing cluster 3

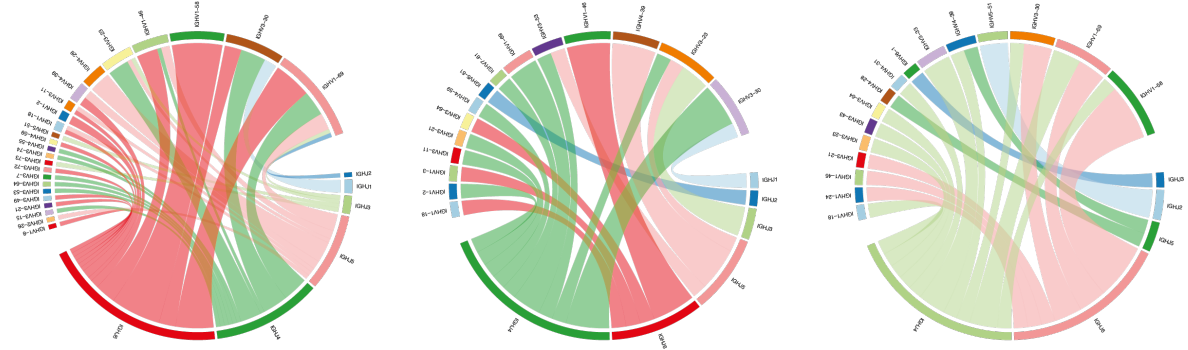

**B**

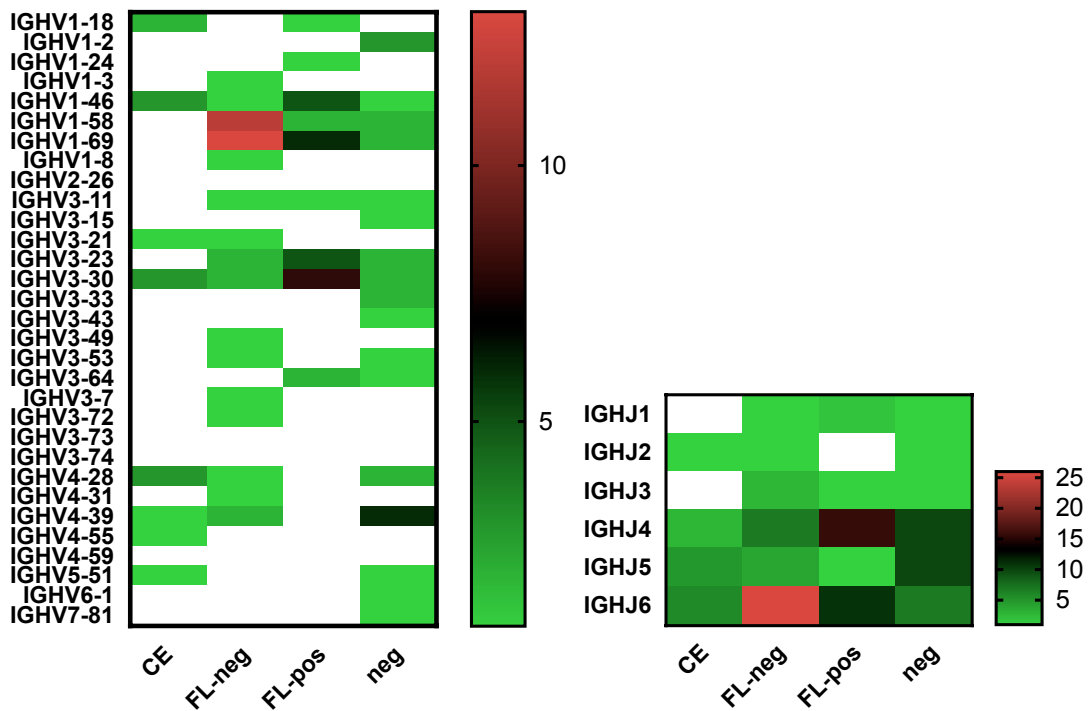

**Supplementary Figure S5: VDJ usage of mAbs expressed from clusters 0/1, 2 and 3.** A) Linkage of V gene and J gene usage for each cluster. Plots were generated with VDJtools (PlotFancyVJUsage) (<https://vdjtools-doc.readthedocs.io>). B) Individual V gene usage and J gene usage for antibodies per binding class: CE: complex epitope, FL-neg: fusionloop negative, FL-pos: fusionloop positive, neg: non-dengue. The color code for the heatmaps in indicated, units are number of antibodies. Related to Figure 2.

# Supplementary Figure S6

A

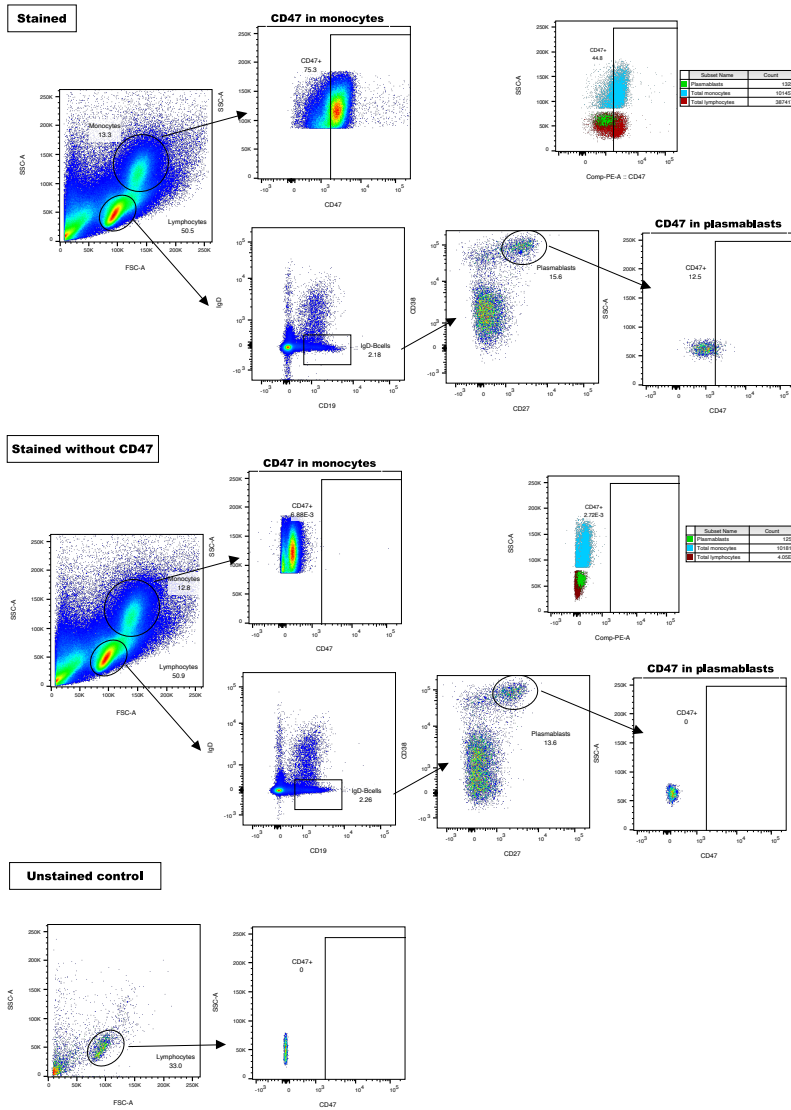

B

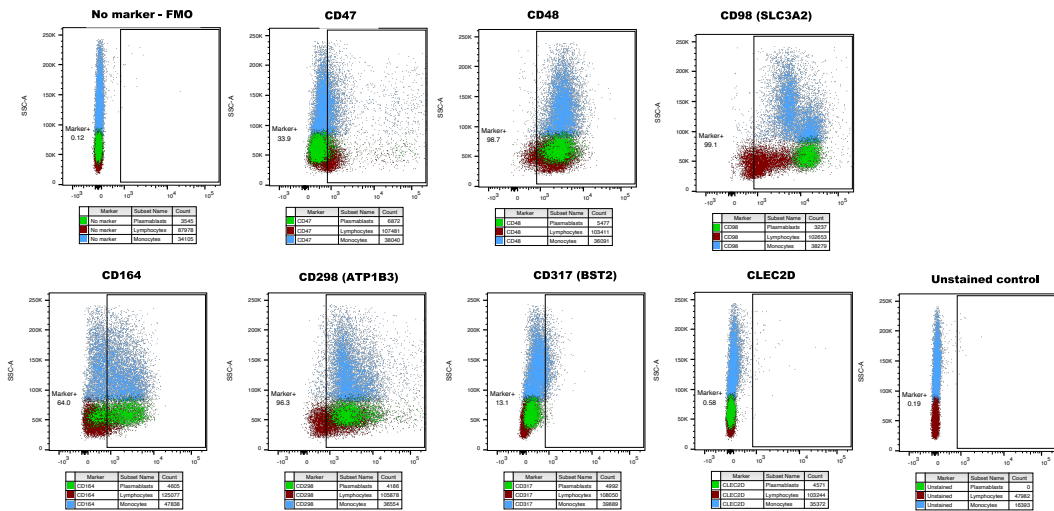

**Supplementary Figure S6: Surface expression of markers differentially expressed in cluster 2 and 3 compared to cluster 0/1.** A) Plasmablast surface protein expression of seven markers that were differentially expressed in clusters 2 and 3 versus clusters 0/1. An overlay of surface marker expression on lymphocytes, monocytes and plasmablasts is shown for reference. **B)** Gating for CD47<sup>+</sup> plasmablasts for a fully stained sample, stain without CD47 (fluorescence minus one FMO) and unstained control. CD47 expression on monocytes was used as a reference to set the CD47 gate. An overlay of CD47 expression on lymphocytes, monocytes and plasmablasts is shown for reference. Related to Figure 3.

# Supplementary Figure S7

A

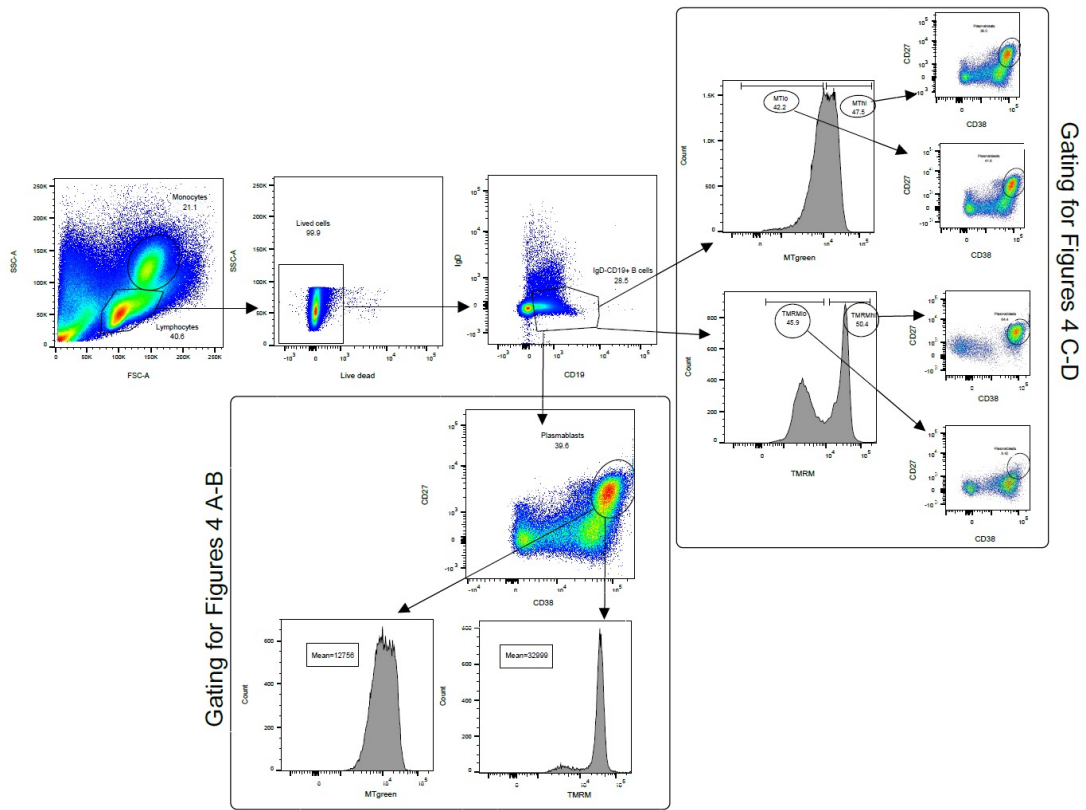

B

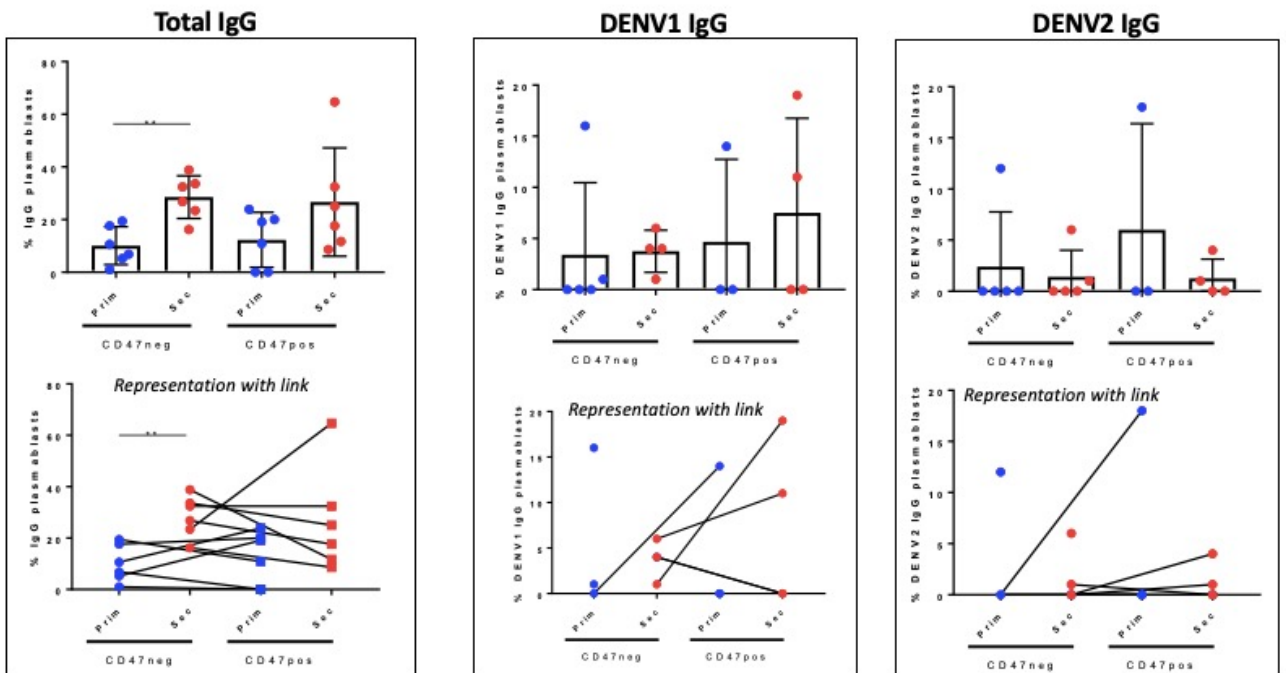

**Supplementary Figure S7: Gating strategy for MT and TMRM content and antibody secretion of CD47<sup>+</sup> and CD47<sup>-</sup> plasmablasts detected by ELISPOT.** A) Gating strategy for the identification of MT or TMRM high and -low plasmablasts. This gating was used for the data illustrated in Figure 4A-B and 4D-E. B) Total IgG-secreting cells, and DENV-1 E protein or DENV-2 E protein specific IgG secreting cells, calculated as a percentage of input sorted plasmablasts. Each symbol represents one donor; the lower panel of graphs links CD47<sup>+</sup> and CD47<sup>-</sup> plasmablasts from the same donor. Bars represent means $\pm$ SD, \*\* p=0.0019. Students t test. Data are combined from three independent experiments. Related to Figure 4.



## Supplementary Figure S8

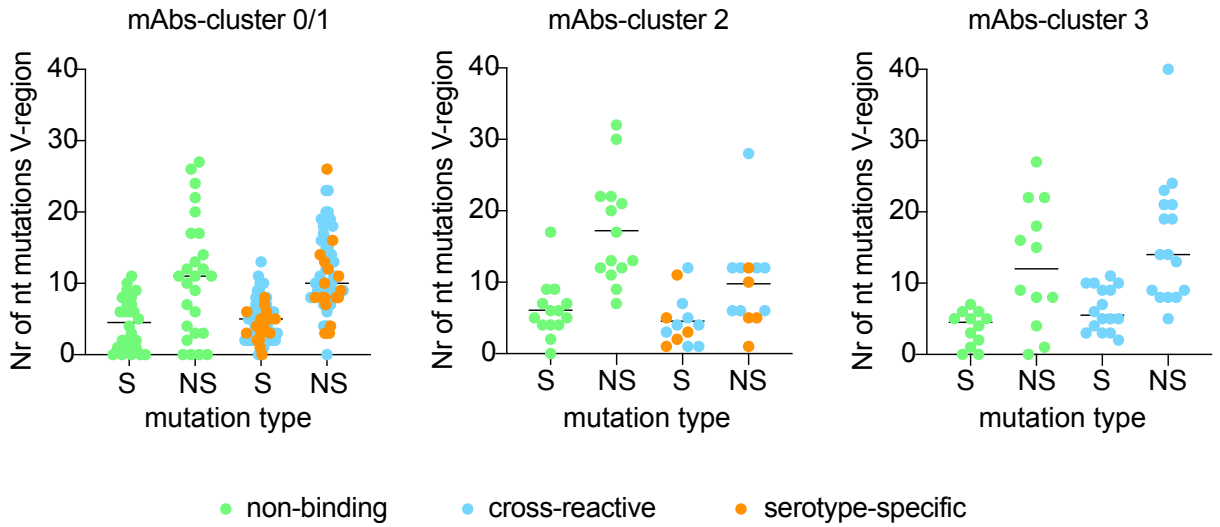

**Supplementary Figure S8: Mutation analysis of antibodies from clusters 0/1, 2 and 3.** The number of nucleotide mutations in the V region as determined by highV-Quest, IMGT, using sequences assembled from RNAseq data using basic algorithm. S: silent, NS: non-silent. Each symbol represents one antibody sequence. The mean is indicated with a bar. Related to Figure 6.

# Supplementary Figure S9

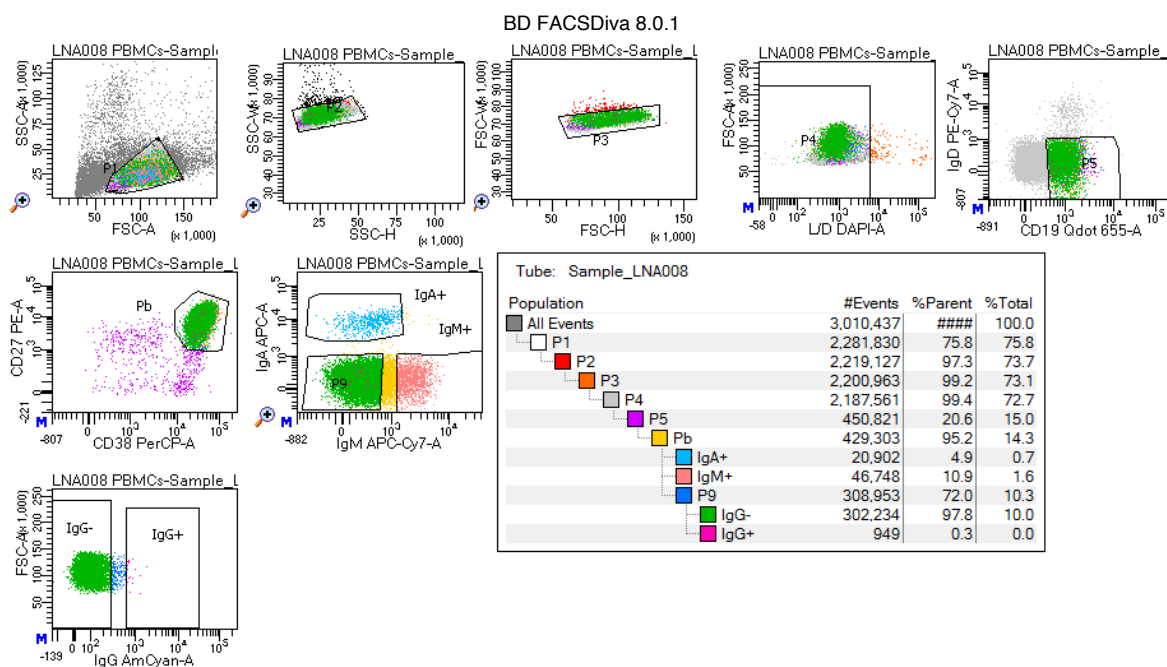

**Supplementary Figure S9: Gating strategy for the sorting of plasmablasts based on Ig surface expression. IgA+, IgM+, IgG+ and IgG- populations were sorted for the analysis shown in Figure 7. Related to Figure 7.**

**Supplementary Table S1:** 100 top DEG between cluster 3 and clusters 0/1 and 2. Related to Figure 1.

|            | p_val     | avg_logFC  | pct.1 | pct.2 | p_val_adj  | cluster | gene     |
|------------|-----------|------------|-------|-------|------------|---------|----------|
| MT-CYB.2   | 4.46E-09  | 0.23914208 | 1     | 0.997 | 8.82E-05   | 3       | MT-CYB   |
| GAPDH.2    | 1.38E-90  | 0.20292327 | 1     | 0.974 | 2.73E-86   | 3       | GAPDH    |
| ACTB.2     | 3.60E-61  | 0.19496342 | 1     | 0.984 | 7.13E-57   | 3       | ACTB     |
| MT-ND4L.2  | 6.33E-11  | 0.18859622 | 1     | 1     | 1.25E-06   | 3       | MT-ND4L  |
| MT-CO1.2   | 4.62E-07  | 0.15491057 | 1     | 1     | 0.00914092 | 3       | MT-CO1   |
| TUBA1B.2   | 1.42E-165 | 0.13086787 | 0.983 | 0.359 | 2.82E-161  | 3       | TUBA1B   |
| MT-RNR2.2  | 5.53E-07  | 0.12370244 | 1     | 1     | 0.01094717 | 3       | MT-RNR2  |
| MT-ND4.2   | 3.74E-12  | 0.11013875 | 1     | 1     | 7.40E-08   | 3       | MT-ND4   |
| ACTG1.2    | 1.07E-38  | 0.10025465 | 0.983 | 0.907 | 2.11E-34   | 3       | ACTG1    |
| MT-RNR1.1  | 4.99E-12  | 0.09711459 | 1     | 0.999 | 9.88E-08   | 3       | MT-RNR1  |
| HMG2.2     | 2.77E-111 | 0.0967229  | 1     | 0.766 | 5.49E-107  | 3       | HMG2     |
| MT-ATP6.2  | 6.86E-07  | 0.09367726 | 1     | 0.997 | 0.01357116 | 3       | MT-ATP6  |
| MT-CO3.2   | 8.32E-07  | 0.07736197 | 1     | 0.994 | 0.01646792 | 3       | MT-CO3   |
| H2AFZ.2    | 3.65E-160 | 0.07500873 | 0.974 | 0.702 | 7.22E-156  | 3       | H2AFZ    |
| MT-ATP8.2  | 1.29E-06  | 0.06642868 | 0.966 | 0.889 | 0.02558412 | 3       | MT-ATP8  |
| TMSB4X.2   | 6.24E-18  | 0.05974827 | 1     | 0.977 | 1.24E-13   | 3       | TMSB4X   |
| TPI1.2     | 9.38E-69  | 0.0566308  | 0.974 | 0.745 | 1.86E-64   | 3       | TPI1     |
| LDHA.2     | 2.02E-73  | 0.05621023 | 0.974 | 0.712 | 4.00E-69   | 3       | LDHA     |
| HIST1H4C.2 | 0         | 0.05490892 | 0.957 | 0.488 | 0          | 3       | HIST1H4C |
| NPM1.2     | 1.78E-52  | 0.05438048 | 0.974 | 0.922 | 3.52E-48   | 3       | NPM1     |
| RAN.2      | 1.23E-73  | 0.05372681 | 0.983 | 0.691 | 2.44E-69   | 3       | RAN      |
| PPIA.2     | 1.51E-54  | 0.05370807 | 0.991 | 0.948 | 2.98E-50   | 3       | PPIA     |
| CFL1.2     | 1.24E-59  | 0.05249302 | 0.991 | 0.934 | 2.46E-55   | 3       | CFL1     |
| EIF4A1.2   | 6.19E-41  | 0.0521868  | 0.983 | 0.868 | 1.23E-36   | 3       | EIF4A1   |
| SLC25A5.2  | 1.01E-62  | 0.05071855 | 0.974 | 0.769 | 2.00E-58   | 3       | SLC25A5  |
| FTL.2      | 1.51E-29  | 0.0498335  | 0.983 | 0.994 | 2.98E-25   | 3       | FTL      |
| ALDOA.2    | 1.84E-48  | 0.04970299 | 0.983 | 0.82  | 3.65E-44   | 3       | ALDOA    |
| ARHGDI.2   | 1.15E-17  | 0.04524813 | 1     | 0.941 | 2.28E-13   | 3       | ARHGDI   |
| ANXA2.2    | 9.01E-12  | 0.04512537 | 0.991 | 0.924 | 1.78E-07   | 3       | ANXA2    |
| ATP5B.2    | 7.55E-26  | 0.04459195 | 0.974 | 0.913 | 1.49E-21   | 3       | ATP5B    |
| MT-ND5.2   | 6.82E-20  | 0.04432886 | 1     | 0.992 | 1.35E-15   | 3       | MT-ND5   |
| RPS2.2     | 3.88E-18  | 0.04286263 | 1     | 0.955 | 7.68E-14   | 3       | RPS2     |
| TAGLN2.2   | 1.34E-26  | 0.04220326 | 0.974 | 0.862 | 2.65E-22   | 3       | TAGLN2   |
| RPLP0.2    | 3.50E-17  | 0.04166771 | 1     | 0.987 | 6.93E-13   | 3       | RPLP0    |
| ENO1.2     | 7.33E-76  | 0.04120131 | 0.974 | 0.765 | 1.45E-71   | 3       | ENO1     |
| MCM7.2     | 5.21E-82  | 0.040564   | 0.94  | 0.233 | 1.03E-77   | 3       | MCM7     |
| PTMA.2     | 6.84E-88  | 0.04034366 | 1     | 0.979 | 1.35E-83   | 3       | PTMA     |
| HMGB1.2    | 5.17E-79  | 0.03977241 | 1     | 0.947 | 1.02E-74   | 3       | HMGB1    |
| UBB.2      | 1.00E-21  | 0.03976571 | 1     | 0.982 | 1.98E-17   | 3       | UBB      |
| GNB2L1.2   | 6.69E-13  | 0.0394505  | 1     | 0.957 | 1.32E-08   | 3       | GNB2L1   |
| HMGB2.2    | 6.14E-97  | 0.03837239 | 0.966 | 0.155 | 1.22E-92   | 3       | HMGB2    |
| PSME2.2    | 1.20E-26  | 0.03736866 | 0.991 | 0.926 | 2.37E-22   | 3       | PSME2    |
| RRM2.2     | 1.02E-88  | 0.03672434 | 0.853 | 0.071 | 2.02E-84   | 3       | RRM2     |
| TMSB10.2   | 4.77E-27  | 0.0365712  | 1     | 0.984 | 9.43E-23   | 3       | TMSB10   |
| TUBB.2     | 6.65E-115 | 0.03608732 | 0.931 | 0.278 | 1.32E-110  | 3       | TUBB     |
| RPL4.2     | 3.92E-14  | 0.03441241 | 0.991 | 0.961 | 7.75E-10   | 3       | RPL4     |
| RPS3.2     | 6.30E-14  | 0.03359699 | 1     | 0.983 | 1.25E-09   | 3       | RPS3     |
| RPSA.2     | 1.02E-25  | 0.03358494 | 0.983 | 0.833 | 2.03E-21   | 3       | RPSA     |
| CORO1A.2   | 2.34E-32  | 0.03278004 | 0.966 | 0.677 | 4.63E-28   | 3       | CORO1A   |

|             |          |            |       |       |            |   |           |
|-------------|----------|------------|-------|-------|------------|---|-----------|
| EEF1G.2     | 1.73E-16 | 0.03246396 | 0.991 | 0.982 | 3.42E-12   | 3 | EEF1G     |
| HNRNPA1.2   | 8.63E-17 | 0.0314516  | 0.983 | 0.937 | 1.71E-12   | 3 | HNRNPA1   |
| RPL7.2      | 5.09E-17 | 0.0313974  | 1     | 0.973 | 1.01E-12   | 3 | RPL7      |
| RPL41.2     | 7.71E-28 | 0.03133105 | 1     | 0.997 | 1.52E-23   | 3 | RPL41     |
| EBP.1       | 8.44E-34 | 0.0311768  | 0.81  | 0.389 | 1.67E-29   | 3 | EBP       |
| PSMB4.2     | 2.02E-15 | 0.03071009 | 0.991 | 0.841 | 4.00E-11   | 3 | PSMB4     |
| PFN1.2      | 1.24E-91 | 0.03001196 | 0.991 | 0.97  | 2.46E-87   | 3 | PFN1      |
| ATP5A1.2    | 1.31E-18 | 0.02999555 | 1     | 0.968 | 2.59E-14   | 3 | ATP5A1    |
| LDHB.2      | 1.20E-35 | 0.02982546 | 0.94  | 0.758 | 2.37E-31   | 3 | LDHB      |
| LSP1.2      | 2.42E-13 | 0.02840182 | 1     | 0.93  | 4.79E-09   | 3 | LSP1      |
| CLIC1.2     | 1.90E-13 | 0.02796548 | 0.991 | 0.919 | 3.77E-09   | 3 | CLIC1     |
| HSPA8.2     | 3.04E-10 | 0.02785909 | 0.983 | 0.925 | 6.01E-06   | 3 | HSPA8     |
| RPL8.2      | 6.39E-12 | 0.02784662 | 1     | 0.99  | 1.26E-07   | 3 | RPL8      |
| OAZ1.2      | 4.19E-21 | 0.02780908 | 0.991 | 0.99  | 8.28E-17   | 3 | OAZ1      |
| RPL5.2      | 9.26E-14 | 0.02768101 | 0.991 | 0.953 | 1.83E-09   | 3 | RPL5      |
| PCNA.2      | 2.33E-83 | 0.0274815  | 0.802 | 0.076 | 4.61E-79   | 3 | PCNA      |
| PGAM1.2     | 8.21E-49 | 0.02729135 | 0.931 | 0.603 | 1.63E-44   | 3 | PGAM1     |
| FTH1.2      | 1.23E-16 | 0.02678318 | 1     | 0.97  | 2.43E-12   | 3 | FTH1      |
| SUB1.2      | 3.81E-11 | 0.02661373 | 1     | 0.997 | 7.55E-07   | 3 | SUB1      |
| HNRNPA2B1.2 | 2.87E-57 | 0.02607023 | 0.991 | 0.82  | 5.67E-53   | 3 | HNRNPA2B1 |
| CALM2.2     | 7.09E-24 | 0.02594923 | 0.931 | 0.767 | 1.40E-19   | 3 | CALM2     |
| CALM1.2     | 4.06E-23 | 0.02594184 | 0.991 | 0.938 | 8.03E-19   | 3 | CALM1     |
| H3F3B.2     | 2.63E-08 | 0.0256402  | 0.983 | 0.965 | 0.00051946 | 3 | H3F3B     |
| EIF4A3.1    | 1.22E-55 | 0.02532284 | 0.871 | 0.274 | 2.41E-51   | 3 | EIF4A3    |
| STMN1.2     | 8.06E-87 | 0.02502553 | 0.897 | 0.163 | 1.59E-82   | 3 | STMN1     |
| RPS5.2      | 1.37E-13 | 0.02464906 | 0.974 | 0.95  | 2.72E-09   | 3 | RPS5      |
| RPS3A.2     | 1.82E-10 | 0.02453792 | 1     | 0.994 | 3.61E-06   | 3 | RPS3A     |
| RPS18.2     | 1.10E-18 | 0.02437291 | 1     | 0.996 | 2.18E-14   | 3 | RPS18     |
| CYC1.2      | 2.56E-34 | 0.02432702 | 0.931 | 0.612 | 5.06E-30   | 3 | CYC1      |
| SLC25A3.2   | 4.47E-10 | 0.02335933 | 0.94  | 0.779 | 8.84E-06   | 3 | SLC25A3   |
| SMC4.2      | 1.07E-52 | 0.02324347 | 0.94  | 0.363 | 2.12E-48   | 3 | SMC4      |
| PDIA6.2     | 5.30E-10 | 0.02314873 | 0.991 | 0.974 | 1.05E-05   | 3 | PDIA6     |
| ARPC2.2     | 2.73E-13 | 0.02313993 | 0.983 | 0.966 | 5.40E-09   | 3 | ARPC2     |
| CHCHD2.2    | 2.02E-32 | 0.02295726 | 0.991 | 0.897 | 4.00E-28   | 3 | CHCHD2    |
| UQCRC1.2    | 1.61E-16 | 0.0228305  | 0.836 | 0.619 | 3.19E-12   | 3 | UQCRC1    |
| DDX39A.2    | 4.77E-38 | 0.02270163 | 0.879 | 0.411 | 9.43E-34   | 3 | DDX39A    |
| HNRNPC.2    | 1.35E-17 | 0.02261847 | 0.983 | 0.833 | 2.67E-13   | 3 | HNRNPC    |
| ANP32E.2    | 2.99E-81 | 0.02250432 | 0.94  | 0.654 | 5.91E-77   | 3 | ANP32E    |
| PSMA4.2     | 5.05E-24 | 0.02228402 | 0.931 | 0.685 | 9.99E-20   | 3 | PSMA4     |
| RPS6.2      | 1.77E-14 | 0.02177789 | 1     | 0.987 | 3.50E-10   | 3 | RPS6      |
| SELT.2      | 4.22E-11 | 0.02160166 | 0.94  | 0.798 | 8.35E-07   | 3 | SELT      |
| PSMB8.2     | 9.47E-09 | 0.02101971 | 0.905 | 0.798 | 0.00018728 | 3 | PSMB8     |
| MYL6.2      | 1.12E-10 | 0.02090649 | 1     | 0.984 | 2.21E-06   | 3 | MYL6      |
| PGK1.2      | 5.42E-16 | 0.0206908  | 0.966 | 0.782 | 1.07E-11   | 3 | PGK1      |
| MT-ND6.2    | 2.72E-17 | 0.02019391 | 0.983 | 0.915 | 5.39E-13   | 3 | MT-ND6    |
| EIF1.2      | 1.93E-08 | 0.02006964 | 0.983 | 0.959 | 0.00038089 | 3 | EIF1      |
| RPL19.2     | 4.03E-13 | 0.02006737 | 1     | 0.977 | 7.98E-09   | 3 | RPL19     |
| EWSR1.2     | 4.06E-10 | 0.01992959 | 0.948 | 0.827 | 8.02E-06   | 3 | EWSR1     |
| ATP5F1.2    | 5.79E-08 | 0.01967873 | 0.828 | 0.63  | 0.00114544 | 3 | ATP5F1    |
| RPL7A.2     | 1.59E-12 | 0.01912488 | 1     | 0.926 | 3.14E-08   | 3 | RPL7A     |
| SRSF3.2     | 1.69E-28 | 0.01911537 | 0.983 | 0.867 | 3.35E-24   | 3 | SRSF3     |
